# Supplementary material for: Facile Fabrication of NIR-Responsive Alginate/CMC Hydrogels Derived through IEDDA Click Chemistry for Photothermal–Photodynamic Anti-Tumor Therapy
Source: MDPI journal article supplement (doi:10.3390/gels9120961), 2023-12-07
Supplement: s1 [file s1]

## Supplementary Materials

### Facile Fabrication of NIR-Responsive Alginate/CMC Hydrogels Derived through IEDDA Click Chemistry for Photothermal–Photodynamic Anti-Tumor Therapy

Ali Rizwan <sup>1</sup>, Israr Ali <sup>1</sup>, Sung-Han Jo <sup>2</sup>, Trung Thang Vu <sup>1</sup>, Yeong-Soon Gal <sup>3</sup>, Yong Hyun Kim <sup>1,4</sup>, Sang-Hyug Park <sup>2,\*</sup> and Kwon Taek Lim <sup>4,5,\*</sup>

<sup>1</sup> Department of Smart Green Technology Engineering, Pukyong National University, Busan 48513, Republic of Korea; arizwan92@outlook.com (A.R.); israrchem@gmail.com (I.A.); vutrongthang29@gmail.com (T.T.V.); yhkim113@pknu.ac.kr (Y.H.K.)

<sup>2</sup> Industry 4.0 Convergence Bionics Engineering, Pukyong National University, Busan 48513, Republic of Korea; josunghan91@gmail.com

<sup>3</sup> Department of Fire Safety, Kyungil University, Gyeongsan 38428, Republic of Korea; ysgal@kiu.ac.kr

<sup>4</sup> Major of Display Semiconductor Engineering, Pukyong National University, Busan 48513, Republic of Korea

<sup>5</sup> Institute of Display Semiconductor Technology, Pukyong National University, Busan 48513, Republic of Korea

\* Correspondence: shpark1@pknu.ac.kr (S.-H.P.); ktlim@pknu.ac.kr (K.T.L.); Tel.: +82-51-629-6406 (K.T.L.)

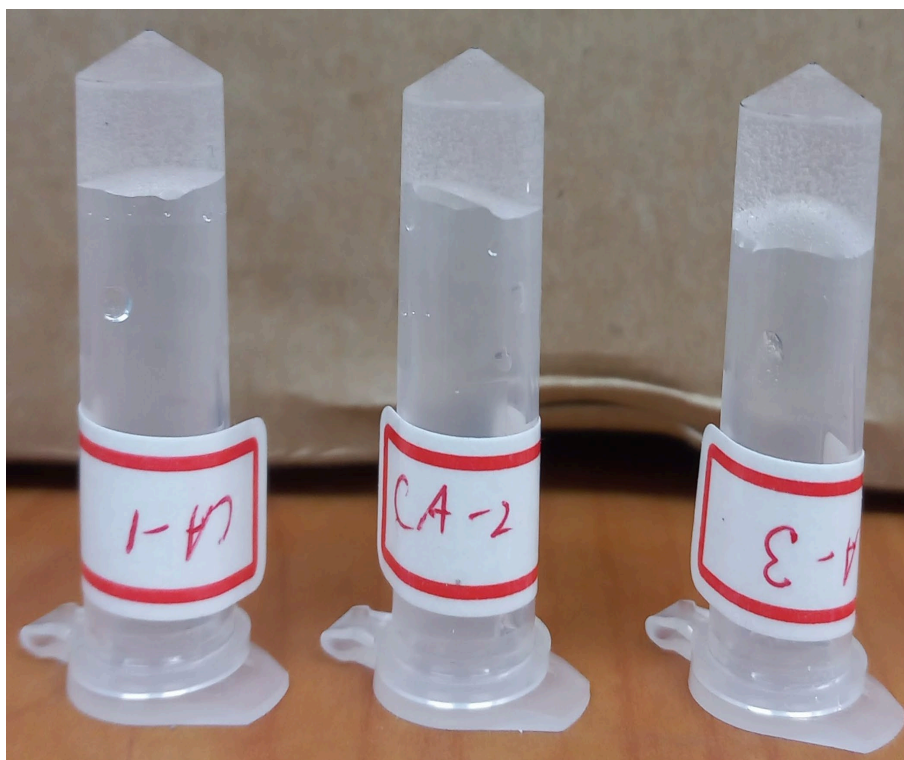

**Figure S1.** Photographic images of fabricated hydrogels derived from bio-conjugated polysaccharide.

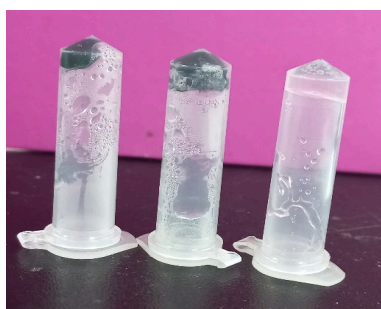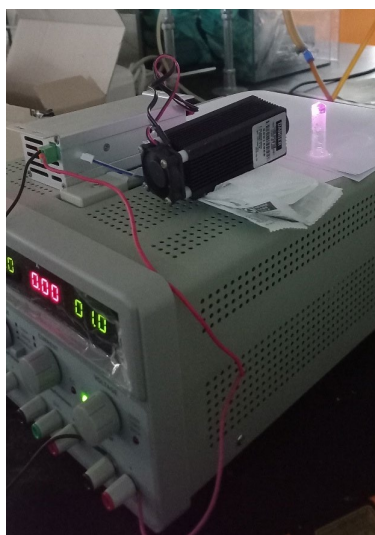

**Figure S2.** Photothermal effect of NIR irradiation on hydrogels.
